# Supplementary material for: Enhanced electrochemiluminescence of CdS quantum dots capped with mercaptopropionic acid activated by EDC for Zika virus detection
Source: Royal Society of Chemistry journal article supplement (doi:10.1039/d0an02437f), 2021-01-01
Supplement: d0an02437f1.pdf [file d0an02437f1.pdf]

## Supporting Information

### **Enhanced electrochemiluminescence of CdS quantum dots capped with mercaptopropionic acid activated by EDC and for Zika Virus detection**

Hui-Jun Zhang<sup>a</sup>, Jin Zhu<sup>b</sup>, Ning Bao<sup>c</sup>, Shou-Nian Ding<sup>a\*</sup>

<sup>a</sup> *Jiangsu Province Hi-Tech Key Laboratory for Bio-medical Research, School of Chemistry and Chemical Engineering, Southeast University, Nanjing 211189, China.*

<sup>b</sup> *Huadong Medical Institute of Biotechniques, Nanjing 210002, China.*

<sup>c</sup> *School of Public Health, Nantong University, 226019 Nantong, Jiangsu, China*

## Supporting Information Content:

|                                                                                                      |    |
|------------------------------------------------------------------------------------------------------|----|
| Reagents and chemicals .....                                                                         | S3 |
| Apparatus .....                                                                                      | S3 |
| Synthesis of SiO <sub>2</sub> microspheres .....                                                     | S3 |
| Preparation of SiO <sub>2</sub> -Ab <sub>1</sub> .....                                               | S4 |
| Figure S1 The UV absorption and FL spectra .....                                                     | S4 |
| Figure S2 FT-IR spectra of SiO <sub>2</sub> and SiO <sub>2</sub> -NH <sub>2</sub> microspheres ..... | S5 |
| Figure S3 Confocal fluorescence images .....                                                         | S5 |
| Figure S4 EIS responses of different modified electrodes .....                                       | S5 |
| Figure S5 ECL-potential curves and CV curves .....                                                   | S6 |
| Figure S6 ECL-potential curves of A-CdTe/GCE and CdTe/GCE .....                                      | S6 |
| Figure S7 Optimization of the amount of QDs, the EDC concentration, the scan rate and pH .....       | S6 |
| Figure S8 Zeta potential of CdS QDs and A-CdS QDs .....                                              | S7 |
| Figure S9 ECL-potential curves of CdS QDs, A-CdS, A-CdS-Gly and A-CdS-Ab <sub>2</sub> .....          | S7 |
| Figure S10 Optimization of incubation time and pH .....                                              | S7 |
| Figure S11 Storage stability, specificity and reproducibility of the immunosensor .....              | S7 |
| Table S1 Comparison of our research with other methods for ZIKV detection .....                      | S8 |
| Table S2 Detection of ZIKV in the serum samples .....                                                | S8 |
| Table S3 Analysis of recovery in ZIKV spiked serum samples .....                                     | S8 |
| References .....                                                                                     | S8 |

## Reagents and chemicals

Cadmium Chloride ( $\text{CdCl}_2 \cdot 2.5 \text{H}_2\text{O}$ , 99%) was purchased from Shanghai Jinshan Tingxin Chemical Reagent Co. Ltd. (Shanghai, China). 3-Mercaptopropionic acid (MPA, 99%) and thiourea (99%) were obtained from Sigma-Aldrich. Sodium hydroxide (NaOH), ammonium hydroxide ( $\text{NH}_3 \cdot \text{H}_2\text{O}$ , 25wt%) and anhydrous ethanol were purchased from Sinopharm Chemical Reagents Co. Ltd. (Shanghai, China). Tetraethyl orthosilicate (TEOS,  $\geq 28.4\%$ ) was bought from Macklin. (3-aminopropyl) triethoxysilane (APTES, 98%), glutaraldehyde (GA, 25%) and potassium chloride (KCl) were purchased from Aladdin. N-(3-Dimethylaminopropyl)-N'-ethylcarbodiimide (EDC, 99%) was bought from Damas-beta. Bovine serum albumin (BSA) was obtained from Sangon Biotech Co., Ltd. Potassium peroxydisulfate ( $\text{K}_2\text{S}_2\text{O}_8$ ) was purchased from Shanghai Ai Jiande initiator Co. Ltd. ZIKV antigen (ZIKV NS1) and anti-ZIKV antibody ( $\text{Ab}_{1(\text{ZIKV})}$ ,  $\text{Ab}_{2(\text{ZIKV})}$ ) were purchased from Shanghai JieYi Biotechnology Co., Ltd (Shanghai, China). Phosphate buffer solution (PBS, 0.1 M, pH 7.4) was freshly prepared before using. The water mentioned below was double distilled water. All reagents and solvents were used without further purification.

## Apparatus

The ECL image was recorded using a PG2000-pro scientific class spectrometer. A conventional three-electrode system was used in the experiment. A glassy carbon electrode (GCE) was used as the working electrode, a platinum wire electrode was used as the auxiliary electrode, and a saturated calomel electrode (SCE) was used as the reference electrode. UV-2450 spectrophotometer (Shimadzu Co.) was used for UV-vis absorption spectra measurement. The fluorescence spectra was conducted on A Fluoromax-4 fluorescence spectrofluorometer (Horiba, USA). Transmission electron microscopy (TEM) measurement was performed on a JEM-2100 transmission electron microscope (JEOL Ltd.). Scanning electron microscopy (SEM) measurement was performed on a FEI Inspect F50 scanning electron microscope. The FT-IR spectrum was obtained from a Nicolet 5700 (USA) IR spectrometer in the range of  $400\text{--}4000 \text{ cm}^{-1}$ . The confocal fluorescence images were recored with Laser Scanning Confocal Microscope (LSM700).

## Synthesis of $\text{SiO}_2$ microspheres

Silica microspheres were synthesized by a modified Stöber method.[1] First, dissolving 0.238 g KCl with 9.45 g deionized water in a 250 ml three port flask. Then successively add 95 mL anhydrous ethanol, 4.039 mL  $\text{NH}_3 \cdot \text{H}_2\text{O}$  and 1.77 mL TEOS, the mixture was under magnetic stirring. Finally, the ethanolic solution of TEOS (4.4 mL TEOS in 33 mL anhydrous ethanol) was continuously supplied with a micro-fluidic pump into the mixture at a rate of  $0.1 \text{ mL} \cdot \text{min}^{-1}$  at  $30 \text{ }^\circ\text{C}$ . The product was washed with water and ethanol for three times by centrifugation at 8,000 rpm and dried for standby.

The aminated  $\text{SiO}_2$  was carried out according to previous method with slight changes [2], 20 mg of  $\text{SiO}_2$  microspheres we re putted into 6 mL anhydrous ethanol

and dissolved under sonication. Then 100  $\mu\text{L}$  APTES was added to the above solution and reacted for 48 h under stirring. The product was dissolved in 6 mL of water after washed with water and anhydrous ethanol by centrifugation at 8,000 rpm.

### Preparation of $\text{SiO}_2\text{-Ab}_1$

10 mg of aminated  $\text{SiO}_2$  was dissolved in 7.5 mL of water, followed by the addition of 2.5 mL of GA (2.5 wt%). The solution was stirred at room temperature for 6 h. The solution was washed three times with PBS (10 mM, pH 7.4) by centrifugation at 8,000 rpm to remove excess GA and then redispersed in 2 mL of PBS (10 mM, pH 7.4). Afterwards, 0.5 mL of the prepared solution was mixed with 0.5 mL of  $\text{Ab}_{1(\text{ZIKV})}$  ( $10 \mu\text{g mL}^{-1}$ ), and the solution was gently shaken for 1 h at room temperature. The mixture was washed with PBS (10 mM, pH 7.4). Finally, the  $\text{SiO}_2/\text{Ab}_{1(\text{ZIKV})}$  mixture was incubated in 0.5 mL of BSA solution (1.0 wt%) to block the nonspecific binding sites. After centrifuging and washing for three times, the  $\text{SiO}_2/\text{Ab}_{1(\text{ZIKV})}/\text{BSA}$  conjugates were obtained. The resultant products were redispersed in 0.5 mL of PBS solution (10 mM, pH 7.4) and stored at 4  $^\circ\text{C}$ .

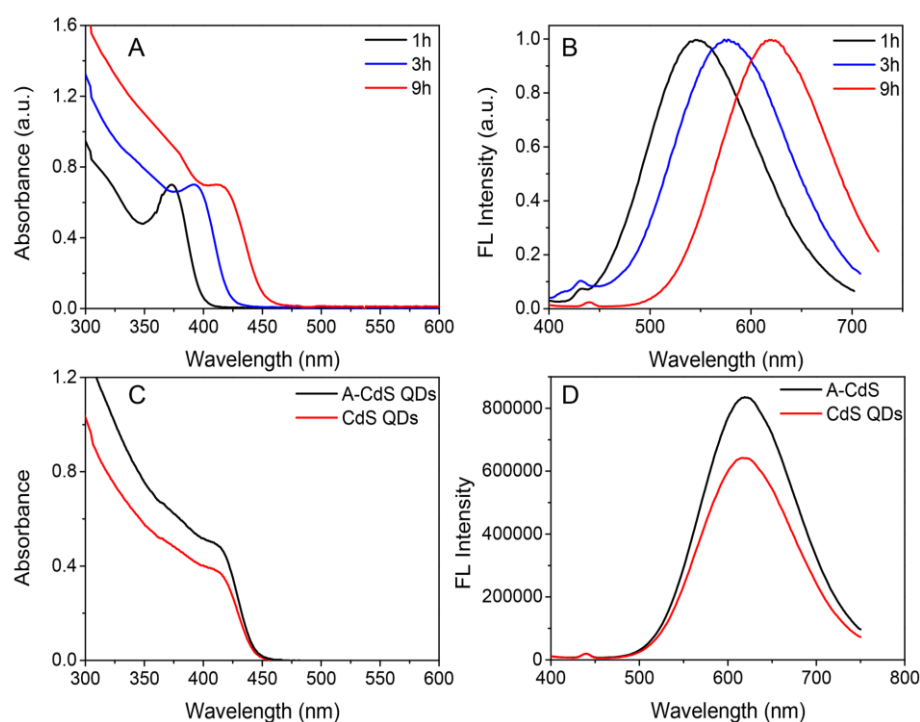

**Figure S1** The UV absorption (A) and FL spectra (B) of MPA@CdS QDs prepared with different reaction time. The UV absorption (C) and FL spectra (D) of MPA@CdS QDs (9h) and corresponding A-CdS QDs.

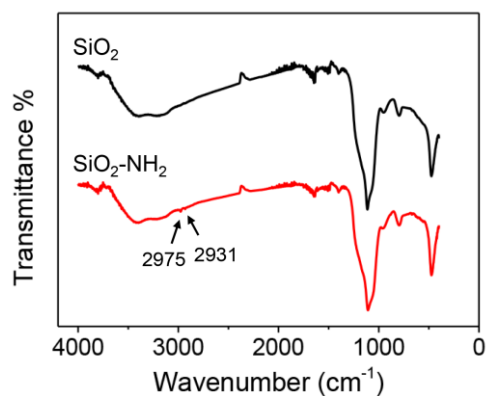

**Figure S2** FT-IR spectra of SiO<sub>2</sub> and SiO<sub>2</sub>-NH<sub>2</sub> microspheres

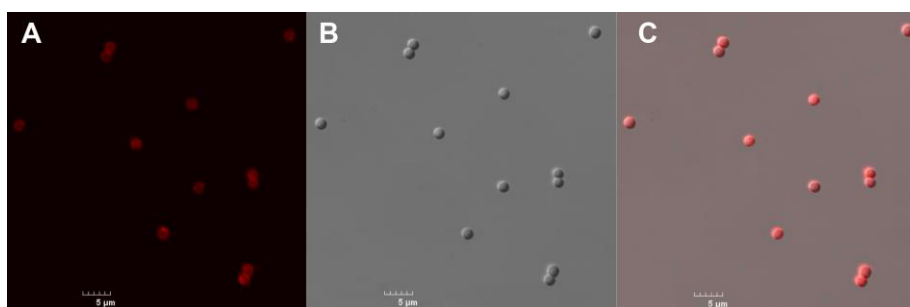

**Figure S3** Confocal fluorescence images of SiO<sub>2</sub>-Ab<sub>1</sub>/Antigen/Ab<sub>2</sub>-QDs: fluorescence field(A), bright field (B), merge image (C)

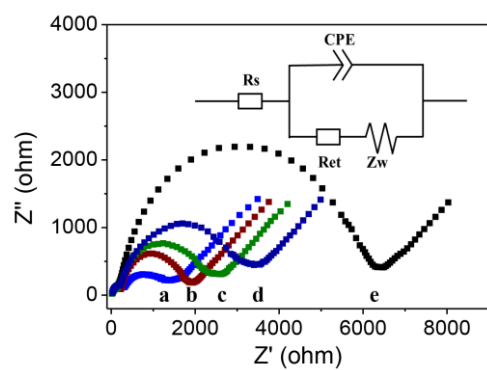

**Figure S4** EIS responses of different modified electrodes: (a) bare GCE; (b) SiO<sub>2</sub>-Ab<sub>1</sub>/GCE; (c): (b)+BSA; (d):(c)+ZIKV antigen; (e):(d)+Ab<sub>2</sub>-QDs. Inset: the Randle's equivalent circuit.

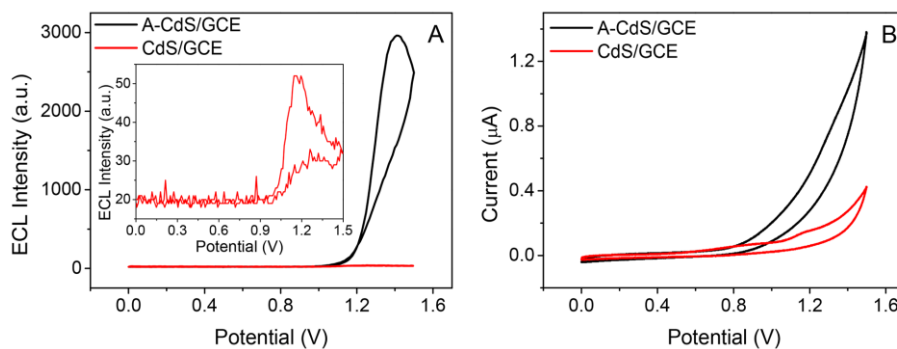

**Figure S5** ECL-potential curves (A) and CV curves (B) of A-CdS QDs/GCE (black line) and CdS QDs/GCE (red Line) detected in 0.1 M PBS (pH 7.4). Scan range: 0-1.5 V. Scan rate:  $0.1 \text{ V}\cdot\text{s}^{-1}$ . PMT: 500 V.

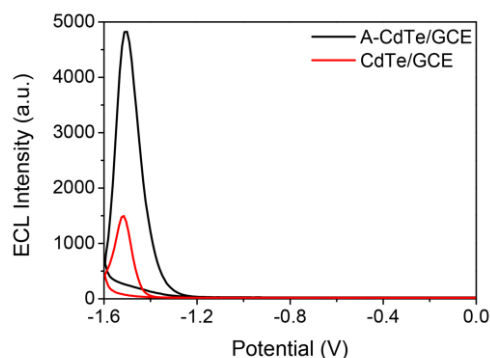

**Figure S6** ECL-potential curves of A-CdTe/GCE (black line) and CdTe/GCE (red line) in 0.1 M PBS (pH 7.4) containing 50 mM  $\text{K}_2\text{S}_2\text{O}_8$ . Scan rate:  $0.1 \text{ V}\cdot\text{s}^{-1}$ . PMT: 300 V.

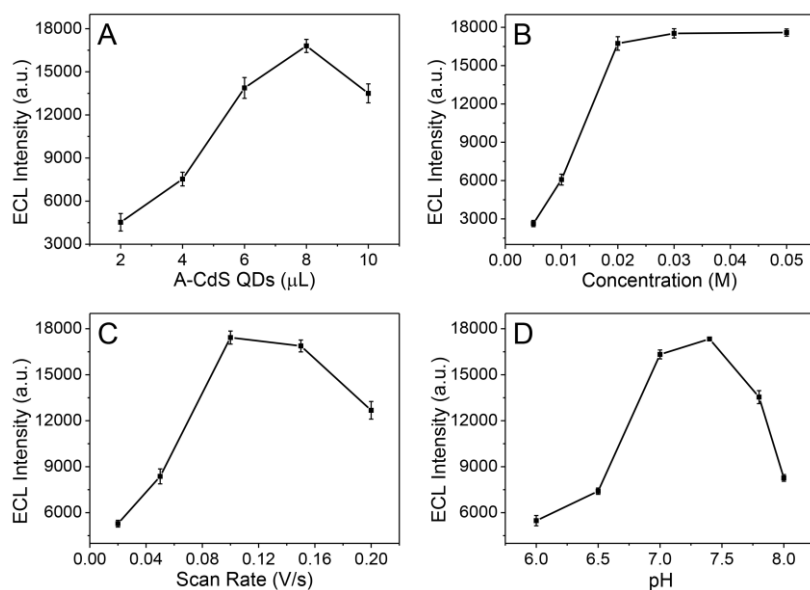

**Figure S7** Optimization of the amount of QDs (A), the EDC concentration (B), the scan rate (C) and pH (D) on ECL responses of the A-CdS QDs/GCE.

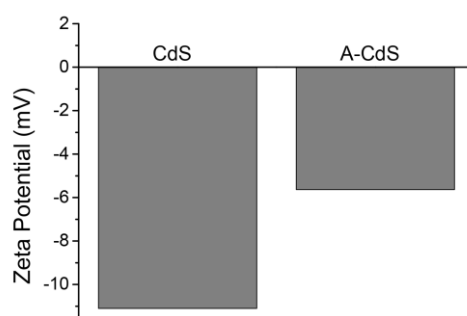

**Figure S8** Zeta potential of CdS QDs and A-CdS QDs.

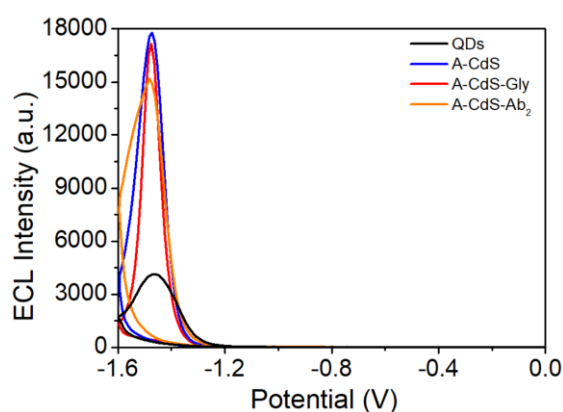

**Figure S9** ECL-potential curves of CdS QDs, A-CdS, A-CdS-Gly and A-CdS-Ab<sub>2</sub> in 0.1 M PBS (pH 7.4) containing 50 mM K<sub>2</sub>S<sub>2</sub>O<sub>8</sub>. Scan rate: 0.1 V·s<sup>-1</sup>. PMT: 500 V.

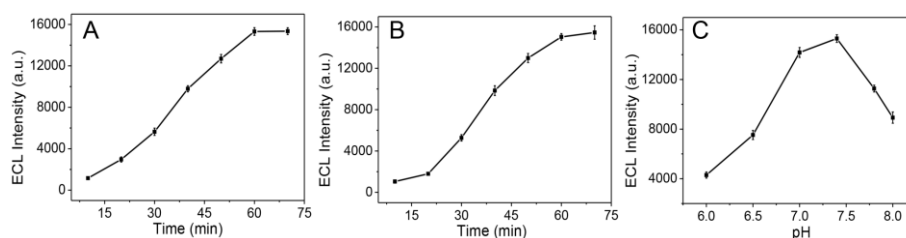

**Figure S10** Optimization of incubation time on ECL intensity: 1st incubation with antigen (A), 2nd incubation with QDs-Ab<sub>2</sub> (B), and pH (C).

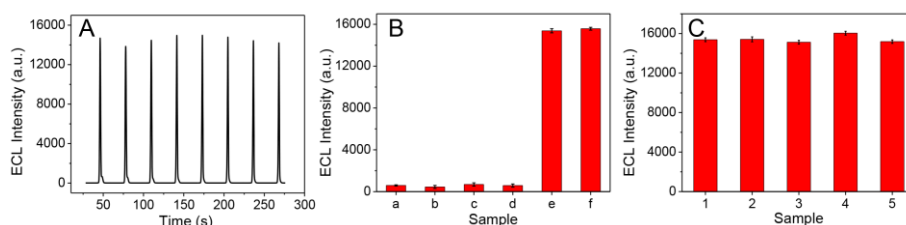

**Figure S11** Storage stability of the immunosensor (A); Specificity of the immunosensor (B) when analyzed with blank (a), CEA (10 ng/mL) (b), Ig G (10 ng/mL) (c), BSA (10 ng/mL) (d), ZIKV (1 ng/mL) (e) and (a)+ (b)+ (c)+(d) (f). Reproducibility studies of the immunosensor (C). Error bar = RSD (n = 3).

**Table S1** Comparison of our research with other methods for ZIKV detection.

| Methods                 | Materials                                     | Target            | Linear ranges          | LOD              | Ref.      |
|-------------------------|-----------------------------------------------|-------------------|------------------------|------------------|-----------|
| FL                      | AuAgNP, QD <sub>646</sub>                     | RNA Zika virus    | 6.73–673<br>copies/mL  | 1.7<br>copies/mL | 3         |
| ECL                     | AuNPs&g-C <sub>3</sub> N <sub>4</sub> @Zr-MOG | RNA Zika virus    | 0.3 nM to 3 $\mu$ M    | 0.1 nM           | 4         |
| DPV                     | Au NPs, Ru <sup>3+</sup>                      | DNA Zika virus    | 10–600 fM              | 0.2 fM           | 5         |
| Cyclic Voltammetry (CV) | ZnO NPs                                       | ZIKV-NS1 antibody | 0.1 ng/mL to 100 ng/mL | 1 pg/mL          | 6         |
| ECL                     | MPA@CdS QDs                                   | ZIKV-NS1 antibody | 1.0 fg/mL to 1.0 ng/mL | 0.3 fg/mL        | This work |

**Table S2** Detection of ZIKV in the serum samples using the proposed immunosensor.

| Serum sample | Concentration (pg/mL) |
|--------------|-----------------------|
| 1            | 93.1                  |
| 2            | 104.5                 |
| 3            | 36.5                  |

**Table S3** Analysis of recovery in ZIKV spiked serum samples

| Sample No. | Initial human serum (pg/mL) | The addition content (pg/mL) | The detection content (pg/mL) | Average (pg/mL) | RSD/% | Recovery % |
|------------|-----------------------------|------------------------------|-------------------------------|-----------------|-------|------------|
| 1          | < LOD                       | 150                          | 154                           | 152.3           | 3.1   | 101.5      |
|            |                             |                              | 147                           |                 |       |            |
|            |                             |                              | 156                           |                 |       |            |
| 2          | < LOD                       | 300                          | 309                           | 306.3           | 3.7   | 102.1      |
|            |                             |                              | 316                           |                 |       |            |
|            |                             |                              | 294                           |                 |       |            |
| 3          | < LOD                       | 450                          | 477                           | 463.0           | 4.7   | 102.9      |
|            |                             |                              | 438                           |                 |       |            |
|            |                             |                              | 474                           |                 |       |            |

## References

- [1] X. Lei, B. Yu, H.-L. Cong, C. Tian, Y.-Z. Wang, Q.-B. Wang and C.-K. Liu, *Integrated Ferroelectrics*, 2014, **154**, 142-146.
- [2] X. Zhang and X. Du, *ACS Appl Mater Interfaces*, 2016, **8**, 1033-1040.
- [3] O. Adegoke, M. Morita, T. Kato, M. Ito, T. Suzuki and E. Y. Park, *Biosensors and Bioelectronics*, 2017, **94**, 513-522.
- [4] Y.-W. Zhang, W.-S. Liu, J.-S. Chen, H.-L. Niu, C.-J. Mao and B.-K. Jin, *Sensors and Actuators B: Chemical*, 2020, **321**.
- [5] S. Cajigas, D. Alzate and J. Orozco, *Mikrochim Acta*, 2020, **187**, 594.
- [6] A. M. Faria and T. Mazon, *Talanta*, 2019, **203**, 153-160.
